# Supplementary material for: The Functionality, Evidence, and Privacy Issues Around Smartphone Apps for the Top Neuropsychiatric Conditions
Source: Atypon-hosted journal article supplement (doi:10.1176/appi.neuropsych.19120353), 2020-07-16
Supplement: appi.neuropsych.19120353.ds001.pdf [file appi.neuropsych.19120353.ds001.pdf]

## **The Functionality, Evidence and Privacy Issues around Smartphone Apps for the Top Neuropsychiatric Conditions: A Comprehensive Study**

Supplemental Document:

Table S1: Defining Composite Table Terms

Table S2: Defining App Features/Function Terms

Table S3: App Details for Stroke Apps

Table S4: App Details for Migraine Apps

Table S5: App Details for Depression-specific Apps

Table S6: App Details for Alzheimer's Apps

Table S7: App Details for Anxiety-specific Apps

Table S8: App Details for Apps Targeting Anxiety and Depression

**Table S1: Defining Composite Table Terms**

| <b>Term in Table</b>        | <b>Definition</b>                                                                                                                                                                                                                                       |
|-----------------------------|---------------------------------------------------------------------------------------------------------------------------------------------------------------------------------------------------------------------------------------------------------|
| Condition                   | Which condition is the app targeting                                                                                                                                                                                                                    |
| Number of downloads         | How many downloads? Based on number reported for the app in the Google Play Store only, as the Apple App Store did not include such information                                                                                                         |
| Clinically customizable     | Can the user add things like symptoms, medications, which activities they want to participate in, add an emotions/rational beliefs list for example, adjust the frequency of the tone or the voice/background music for music as intervention apps, etc |
| Self-help/public            | Is the app designed to be used by the public/ person directly experiencing the neuropsychiatric condition in question                                                                                                                                   |
| Part of care with clinician | Can the user connect with health professional through the app                                                                                                                                                                                           |
| Online coaching             | Can work with online counselor/coach directly through the app, or speak with an AI bot to talk through problems                                                                                                                                         |
| Intervention                | Functions to help patient address/alleviate their problem (meditation/mindfulness for anxiety and depression, or memory games for Alzheimer's patients for example)                                                                                     |
| Intervention evidence-based | Has the app and the intervention it explicitly delivers shown to be effective amongst app users (using research methods)                                                                                                                                |
| Username/password           | Does the app provide some kind of username and/or password for the user                                                                                                                                                                                 |
| Payment                     | Do you have to pay anything (initial app purchase, subscription/for additional features) to acquire or gain full functioning of the app and all of its features                                                                                         |
| Rewards behavior change     | Can user level up for instance, receive badges for completing tasks, keeping a streak, receiving encouragement from the app for completing tasks                                                                                                        |
| Privacy Policy              | Is there a privacy policy present on the app store/in the app itself, or on the app website                                                                                                                                                             |

Time to evaluate

How long did it take reviewer to evaluate the app? If app was reviewed for both operating systems, an average of this time was taken

**Table S2: Defining App Features/Function Terms**

| <b>Term</b>                       | <b>Definition</b>                                                                                                                                                                                                                               |
|-----------------------------------|-------------------------------------------------------------------------------------------------------------------------------------------------------------------------------------------------------------------------------------------------|
| Tracking                          | Does the app have some kind of diary capacity that enables user to track/monitor their symptoms, moods, medications, etc                                                                                                                        |
| Generates Data Report             | Is there a data report generated that displays a summary of user activity/data (graphically, or in table format for instance)                                                                                                                   |
| Education                         | Does the app offer some kind of educational information (related to the condition, the intervention provided) in the form of text or recording                                                                                                  |
| Displays user entered information | Displays journal entries, passed scores, survey results, log of conversation with coach/AI bot, user input data                                                                                                                                 |
| Data export/download              | Does the user have the ability to download and export the data generated using the app                                                                                                                                                          |
| Provides guidance                 | Does the app guide the user to do certain activities or exercises within the app based on information users previously input in the app (for example: if user reports experiencing anxiety, does the app request the user to take deep breaths) |
| Intercommunicability              | Does app have the ability to share information/link with other apps (for example: can you email someone through Gmail or access Facebook directly through the app?). Can you share the app data or achievements directly to another app         |
| Social network                    | Can you develop an internal network with other users on the app through forums, chats, groups                                                                                                                                                   |
| Organization support/endorsement  | Does the app have support listed in the app itself, on the app store, or on the app website suggesting endorsement/affiliation/support from other companies                                                                                     |

**Table S3: App Details for Stroke Apps**

| <b>App Name</b>                                    | <b>Developer</b>             | <b>Operating System</b> | <b>Number of Downloads*</b> | <b>Number of Ratings, Average Rating</b> | <b>Cost to Purchase</b> | <b>Date Reviewed</b> | <b>Search Result Number in Store(s)</b> |
|----------------------------------------------------|------------------------------|-------------------------|-----------------------------|------------------------------------------|-------------------------|----------------------|-----------------------------------------|
| Language Therapy Lite                              | Tactus Therapy Solutions Ltd | iOS                     | N/A                         | 17; 4.1                                  | Free                    | 8/23/18              | 1                                       |
| Constant Therapy                                   | Constant Therapy             | Android, iOS            | 10,000                      | 205, 97; 4.1, 4.3                        | Free                    | 8/27/18; 8/23/18     | 5; 2                                    |
| Category Therapy Lite                              | Tactus Therapy Solutions Ltd | Android, iOS            | 1,000                       | 6, 0; 4.8, N/A                           | Free                    | 8/27/18; 8/23/18     | 16; 8                                   |
| Orienteer                                          | Reflex Pain Management Ltd   | Android                 | 6,000                       | 71; 4.7                                  | Free                    | 8/27/18              | 9                                       |
| Visual Attention Therapy Lite - Cognitive Training | Tactus Therapy Solutions Ltd | Android, iOS            | 5,000                       | 9, 0; 3.1, N/A                           | Free                    | 8/27/18; 8/23/18     | 21; 11                                  |
| Advanced Naming Therapy Lite                       | Tactus Therapy Solutions Ltd | iOS                     | N/A                         | 0, N/A                                   | Free                    | 9/2/18               | 18                                      |
| Advanced Reading Therapy Lite                      | Tactus Therapy Solutions Ltd | iOS                     | N/A                         | 0, N/A                                   | Free                    | 9/2/18               | 24                                      |
| Think Therapy                                      | Think Therapy                | Android                 | 100                         | 3, 4.3                                   | Free                    | 8/27/18              | 43                                      |

\*Number of Downloads data was reported for Android apps only. Apps evaluated on both the Android and iOS platforms have their ratings, date reviewed, and search number result in their respective stores listed with Android data first and iOS data second.

**Table S4: App Details for Migraine Apps**

| <b>App Name</b>                        | <b>Developer</b>                                        | <b>Operating System</b> | <b>Number of Downloads*</b> | <b>Number of Ratings, Average Rating</b> | <b>Cost to Purchase</b> | <b>Date Reviewed</b> | <b>Search Result Number in Store(s)</b> |
|----------------------------------------|---------------------------------------------------------|-------------------------|-----------------------------|------------------------------------------|-------------------------|----------------------|-----------------------------------------|
| Migraine Buddy                         | Healint                                                 | Android, iOS            | 500,000                     | 18,000, 8,580; 4.7, 4.7                  | Free                    | 7/30/18              | 1; 1                                    |
| Migraine Monitor                       | Health Monitor Network/Data Centrum Communications Inc. | Android, iOS            | 5,000                       | 60, 18; 4.2, 3.9                         | Free                    | 7/30/18; 8/10/18     | 2; 8                                    |
| Migraine eDiary                        | Pifzer                                                  | Android, iOS            | 5,000                       | 20, 6; 3.9, 3                            | Free                    | 8/2/18; 8/2/18       | 9; 2                                    |
| <b>App Name</b>                        | <b>Developer</b>                                        | <b>Operating System</b> | <b>Number of Downloads*</b> | <b>Number of Ratings, Average Rating</b> | <b>Cost to Purchase</b> | <b>Date Reviewed</b> | <b>Search Result Number in Store(s)</b> |
| Migraine                               | Schmerzlinik Kiel GmbH & Co KG                          | iOS                     | N/A                         | 0, N/A                                   | Free                    | 8/2/18               | 3                                       |
| Migraine Relief Hypnosis               | Surf City Apps                                          | Android, iOS            | 10,000                      | 139, 21; 4.2, 4.2                        | Free                    | 7/31/18, 8/2/18      | 3; 5                                    |
| Migraine Headache Diary - Headapp Lite | m3 Technology Srl                                       | Android                 | 10,000                      | 409; 4.5                                 | Free                    | 7/31/18              | 4                                       |
| Migraine Headache Relief Music         | Rehegoo                                                 | Android, iOS            | 10,000                      | 62, 2; 4, N/A                            | Free                    | 7/31/18; 8/11/18     | 6; 26                                   |
| Migraine Alert                         | Second Opinion Health Inc                               | iOS                     | N/A                         | 5; 5                                     | 1.99                    | 8/10/18              | 6                                       |
| Acupressure Against Migraine           | Dr. J Bargak                                            | Android                 | 5,000                       | 40; 4                                    | Free                    | 7/31/18              | 7                                       |
| Migraine Diary 2                       | cellHigh                                                | iOS                     | N/A                         | 0; N/A                                   | 4.99                    | 8/10/18              | 9                                       |
| iMigraine Tracker                      | Soft Archtechnologies AS                                | Android                 | 1,000                       | 39; 3.8                                  | Free                    | 8/2/18               | 10                                      |
| Migraine Insight: Tracker              | Shiny New App                                           | iOS                     | N/A                         | 12; 5                                    | Free                    | 8/10/18              | 11                                      |

|                                                             |                     |                         |                             |                                          |                         |                      |                                         |
|-------------------------------------------------------------|---------------------|-------------------------|-----------------------------|------------------------------------------|-------------------------|----------------------|-----------------------------------------|
| Music to Beat Migraine                                      | Times Music         | Android                 | 10,000                      | 118; 3.5                                 | Free                    | 8/2/18               | 11                                      |
| Headache Log                                                | AR Products Inc     | Android                 | 10,000                      | 479; 4.3                                 | Free                    | 8/11/18              | 11                                      |
| My Migraine Triggers                                        | GSK                 | Android                 | 10,000                      | 152; 3.6                                 | Free                    | 8/2/18               | 12                                      |
| Curable                                                     | Curable Inc         | Android                 | 5,000                       | 65; 4.3                                  | Free                    | 8/11/18              | 12                                      |
| Migraine Diary                                              | Steveloper          | Android                 | 5,000                       | 11; 3.4                                  | Free                    | 8/8/18               | 12                                      |
| Get Migraine Free! Headache and Migraine Relief by Hypnosis | Get on Apps!        | iOS                     | N/A                         | 0; N/A                                   | 1.99                    | 8/10/18              | 13                                      |
| My Ocular Migraine Journal                                  | Digging up Logic    | Android                 | 500                         | 3; 5                                     | Free                    | 8/8/18               | 13                                      |
| MigraineMind Migraine Diary                                 | Haptic Software Inc | iOS                     | N/A                         | 0; N/A                                   | 2.99                    | 8/10/18              | 15                                      |
| <b>App Name</b>                                             | <b>Developer</b>    | <b>Operating System</b> | <b>Number of Downloads*</b> | <b>Number of Ratings, Average Rating</b> | <b>Cost to Purchase</b> | <b>Date Reviewed</b> | <b>Search Result Number in Store(s)</b> |
| Migraine Log                                                | Jim Corbo           | iOS                     | N/A                         | 0; N/A                                   | 0.99                    | 8/11/18              | 17                                      |
| Migraine Diary                                              | AppsByDocs          | iOS                     | N/A                         | 0; N/A                                   | Free                    | 8/11/18              | 19                                      |
| MigCalendar-Migraine Diary                                  | MedyCal             | Android                 | 100                         | 2; 3.5                                   | Free                    | 8/11/18              | 19                                      |
| Migraine-Triggers and Diary                                 | Stefan Roobol       | iOS                     | N/A                         | 0, N/A                                   | 0.99                    | 8/11/18              | 20                                      |
| Migraine and Headache Diary                                 | Samantha Roobol     | iOS                     | N/A                         | 0, N/A                                   | Free                    | 8/11/18              | 24                                      |

\*Number of Downloads data was reported for Android apps only. Apps evaluated on both the Android and iOS platforms have their ratings, date reviewed, and search number result in their respective stores listed with Android data first and iOS data second.

**Table S5: App Details for Depression-specific Apps**

| <b>App Name</b>                | <b>Developer</b>  | <b>Operating System</b> | <b>Number of Downloads*</b> | <b>Number of Ratings, Average Rating</b> | <b>Cost to Purchase</b> | <b>Date Reviewed</b> | <b>Search Result Number in Store(s)</b> |
|--------------------------------|-------------------|-------------------------|-----------------------------|------------------------------------------|-------------------------|----------------------|-----------------------------------------|
| Mood Tools - Depression Aid    | Moodtools         | Android                 | 100,000                     | 2,803; 4.3                               | Free                    | 8/6/18               | 4                                       |
| Depression CBT Self Help Guide | Excel at Life     | Android                 | 100,000                     | 1396; 4.2                                | Free                    | 8/6/18               | 5                                       |
| Fight Depression Naturally     | Tipsbook          | Android                 | 50,000                      | 311; 4.6                                 | Free                    | 8/6/18               | 7                                       |
| Mindfulness for Depression     | Mindfulness Today | Android                 | 5,000                       | 11; 4.2                                  | Free                    | 8/12/18              | 15                                      |
| Depression Cure Music          | S&R Jossan        | Android                 | 50,000                      | 480; 4.4                                 | Free                    | 8/12/18              | 18                                      |
| MoodSpace                      | Boundless         | Android                 | 50,000                      | 522; 4.5                                 | Free                    | 8/13/18              | 26                                      |
| GGDE Beat & Prevent Depression | Samuramu          | iOS                     | N/A                         | 0, N/A                                   | Free                    | 8/13/18              | 34                                      |

\*Number of Downloads data was reported for Android apps only.



**Table S6: App Details for Alzheimer’s Apps**

| <b>App Name</b>                              | <b>Developer</b>      | <b>Operating System</b> | <b>Number of Downloads*</b> | <b>Number of Ratings, Average Rating</b> | <b>Cost to Purchase</b> | <b>Date Reviewed</b> | <b>Search Result Number in Store(s)</b> |
|----------------------------------------------|-----------------------|-------------------------|-----------------------------|------------------------------------------|-------------------------|----------------------|-----------------------------------------|
| Alzheimer's Speed of Processing Game - ASPEN | The Happy Steps       | Android                 | 1,000                       | 15; 4.3                                  | Free                    | 8/13/18              | 4                                       |
| Alzheimer's Life Therapy                     | Alzheimer's Light     | iOS                     | N/A                         | 23; 5                                    | Free                    | 8/15/18              | 6                                       |
| Alzheimer's Manager                          | @Point of Care        | iOS                     | N/A                         | 0; N/A                                   | Free                    | 8/15/18              | 10                                      |
| Alzheimer's VR                               | Alzheimer's           | Android                 | 100                         | 3; 5                                     | Free                    | 7/23/18              | 10                                      |
| MindMate- Healthy Aging                      | MindMate LTD          | iOS                     | N/A                         | 281; 4.7                                 | Free                    | 8/15/18              | 19                                      |
| Vital Tones Alzheimer                        | Vital Tones LLC       | Android                 | 100                         | 1; 5                                     | Free                    | 8/14/18              | 22                                      |
| CogFit Brain Test & Training                 | CogniFit              | iOS                     | N/A                         | 109; 4.2                                 | Free                    | 8/15/18              | 34                                      |
| Brainy App 2.0                               | Alzheimer's Australia | Android                 | 5,000                       | 12; 2.8                                  | Free                    | 8/14/18              | 38                                      |

\*Number of Downloads data was reported for Android apps only.

**Table S7: App Details for Anxiety-specific Apps**

| App Name                                        | Developer                         | Operating System | Number of Downloads* | Number of Ratings, Average Rating | Cost to Purchase | Date Reviewed    | Search Result Number in Store(s) |
|-------------------------------------------------|-----------------------------------|------------------|----------------------|-----------------------------------|------------------|------------------|----------------------------------|
| Headspace: Meditation                           | Headspace Inc                     | Android, iOS     | 10 million           | 78,360, 314,000; 4.6, 4.9         | Free             | 8/18/18; 8/16/18 | 14; 2                            |
| Dare - Break Free From Anxiety                  | BMD Publishing                    | Android          | 50,000               | 785; 4.7                          | Free             | 8/16/18          | 2                                |
| Self-help for Anxiety Management                | University of the West of England | iOS              | N/A                  | 31; 3.9                           | Free             | 8/16/18          | 3                                |
| Rootd- Panic Attack and Anxiety Relief          | Simply Rooted Media               | Android          | 10,000               | 186; 4.1                          | Free             | 8/17/18          | 5                                |
| Calm                                            | Calm.com                          | Android, iOS     | 5 million            | 114,590, 151,000; 4.6, 4.8        | Free             | 8/28/18; 8/16/18 | 8; 6                             |
| Stop Panic and Anxiety Self Help                | Excel at Life                     | Android          | 100,000              | 2,234; 4.4                        | Free             | 8/17/18          | 9                                |
| App Name                                        | Developer                         | Operating System | Number of Downloads* | Number of Ratings, Average Rating | Cost to Purchase | Date Reviewed    | Search Result Number in Store(s) |
| FearTools-Anxiety Aid                           | Moodtools                         | Android          | 10,000               | 67, 4.6                           | Free             | 8/18/18          | 11                               |
| Aura: Calm, Anxiety & Sleep                     | Aura Health inc.                  | iOS              | N/A                  | 5,640; 4.8                        | Free             | 8/16/18          | 13                               |
| Anxiety                                         | AppCounselor                      | Android          | 1,000                | 26; 4.0                           | 0.99             | 8/18/18          | 16                               |
| Stop, Breathe & Think                           | Stop, Breathe & Think             | iOS              | N/A                  | 6,190; 4.8                        | Free             | 8/16/18          | 22                               |
| Relax Melodies: Sleep Sounds                    | Ipnos Software, Inc.              | iOS              | N/A                  | 84,700; 4.8                       | Free             | 9/2/18           | 23                               |
| Insight Timer- Meditation App                   | Insight Network Inc.              | iOS              | N/A                  | 63,600; 4.9                       | Free             | 9/2/18           | 26                               |
| Breathe- Meditation & Music,                    | OMG. I Can Meditate! Inc.         | iOS              | N/A                  | 9,100; 4.8                        | Free             | 9/2/18           | 27                               |
| Anxiety Relief- Help with Panic Attacks, Stress | Tom MacKay                        | iOS              | N/A                  | 0; N/A                            | 2.99             | 9/2/18           | 33                               |

\*Number of Downloads data was reported for Android apps only. Apps evaluated on both the Android and iOS platforms have their ratings, date reviewed, and search number result in their respective stores listed with Android data first and iOS data second.

**Table S8: App Details for Apps Targeting Anxiety and Depression**

| <b>App Name</b>                                     | <b>Developer</b>            | <b>Operating System</b> | <b>Number of Downloads*</b> | <b>Number of Ratings, Average Rating</b> | <b>Cost to Purchase</b> | <b>Date Reviewed</b> | <b>Search Result Number in Store(s)</b> |
|-----------------------------------------------------|-----------------------------|-------------------------|-----------------------------|------------------------------------------|-------------------------|----------------------|-----------------------------------------|
| Moodpath: Depression & Anxiety                      | MoodPath                    | Android, iOS            | 100,000                     | 6,024, 3,110;<br>4.5, 4.7                | Free                    | 8/4/18; 8/19/18      | 2; 1                                    |
| Youper                                              | Youper Inc                  | Android, iOS            | 50,000                      | 2,763, 574;<br>4.7, 4.9                  | Free                    | 8/17/18; 8/11/18     | 1; 3                                    |
| Pacifica - Stress & Anxiety                         | Pacific Labs, Inc           | Android, iOS            | 500,000                     | 10,307, 1,370;<br>4.4, 4.7               | Free                    | 8/11/18; 8/11/18     | 9; 5                                    |
| 7 Cups: Anxiety & Stress Chat                       | 7 Cups of Tea               | Android, iOS            | 500,000                     | 13,868, 485,<br>4.2, 4.2                 | Free                    | 8/12/18; 8/13/18     | 25; 6                                   |
| What's up? Mental Health App                        | Jackson Tempra              | Android, iOS            | 100,000                     | 2,871, 82,<br>4.4, 4.6                   | Free                    | 8/12/18; 8/11/18     | 17; 14                                  |
| <b>App Name</b>                                     | <b>Developer</b>            | <b>Operating System</b> | <b>Number of Downloads*</b> | <b>Number of Ratings, Average Rating</b> | <b>Cost to Purchase</b> | <b>Date Reviewed</b> | <b>Search Result Number in Store(s)</b> |
| Betterhelp Counseling and Therapy                   | Betterhelp                  | Android, iOS            | 100,000                     | 3,337, 1,630;<br>3.9, 4.4                | Free                    | 8/16/18; 8/11/18     | 1; 15                                   |
| Wysa - AI Therapy                                   | Touchkin                    | Android                 | 100,00                      | 7,336; 4.5                               | Free                    | 8/6/18               | 3                                       |
| Happify: for Stress & Worry                         | Happify Inc                 | iOS                     | N/A                         | 1,069; 4.5                               | Free                    | 8/13/18              | 4                                       |
| Talkspace Online Therapy                            | Groop Internet Platform Inc | iOS                     | N/A                         | 2,450; 4.2                               | Free                    | 8/11/18              | 7                                       |
| Relieve Depression Hypnosis: Mood and Anxiety Help/ | Surf City Apps              | Android, iOS            | 50,000                      | 317, 39;<br>4.0, 4.2                     | Free                    | 8/6/18; 8/11/18      | 8; 8                                    |
| Innerhour - Self Help for Anxiety & Depression      | Innerhour                   | Android                 | 100,000                     | 312; 4.1                                 | Free                    | 8/7/18               | 9                                       |
| Mood Triggers                                       | Mood Triggers               | Android                 | 10,000                      | 360; 3.9                                 | Free                    | 8/8/18               | 11                                      |
| Anxietyhelper                                       | Amanda Southworth           | iOS                     | N/A                         | 70; 4.3                                  | Free                    | 8/13/18              | 21                                      |
| SuperBetter                                         | SuperBetter, LLC            | iOS                     | N/A                         | 2,780; 4.7                               | Free                    | 8/13/18              | 24                                      |
| Stigma:Mood Tracker & Journal                       | Stigma Inc                  | iOS                     | N/A                         | 237; 4.1                                 | Free                    | 8/13/18              | 28                                      |

|                                                   |                            |              |         |                       |      |                  |       |
|---------------------------------------------------|----------------------------|--------------|---------|-----------------------|------|------------------|-------|
| Mood App-Journal                                  | Young Human LLC            | iOS          | N/A     | 274; 4.5              | Free | 8/13/18          | 29    |
| eMoods Bipolar Mood Tracker                       | Yottaram, LLC              | iOS          | N/A     | 671; 4.8              | Free | 8/13/18          | 30    |
| End Anxiety Hypnosis-Stress, Panic Attack Relief  | Surf City Apps             | Android, iOS | 100,000 | 1,1128, 231; 4.2, 4.6 | Free | 8/17/18; 8/16/18 | 6; 10 |
| Hypnosis for Anxiety, Stress Relief, & Depression | Pitashi Mobile Imagination | Android      | 50,000  | 250; 4.5              | Free | 8/18/18          | 12    |
| Anxiety Tracker - Stress and Anxiety Log          | Appstronaut Studios        | Android      | 5,000   | 40; 3.8               | Free | 8/18/18          | 13    |
| Abide - Christian Meditation                      | Carpenters Code Inc        | iOS          | N/A     | 14,000; 4.8           | Free | 9/2/18           | 25    |

\*Number of Downloads data was reported for Android apps only. Apps evaluated on both the Android and iOS platforms have their ratings, date reviewed, and search number result in their respective stores listed with Android data first and iOS data second.
